# Supplementary material for: Enhancing the performance of indoor organic photovoltaics through precise modulation of chlorine density in wide bandgap random copolymers
Source: Royal Society of Chemistry journal article supplement (doi:10.1039/d3ta06624j), 2023-12-22
Supplement: d3ta06624j1.pdf [file d3ta06624j1.pdf]

## Supplementary Material (ESI)

### Enhancing the Performance of Indoor Organic Photovoltaics through Precise

### Modulation of Chlorine Density in Wide Bandgap Random Copolymers

*Soyoung Kim, Seon Joong Kim, Gayoung Ham, Ji-Eun Jeong, Donghwa Lee, Eunho Lee, Hyungju Ahn, Hyojung Cha\*, Jae Won Shim\*, and Wonho Lee\**

#### *Experimental section*

*Materials:* 2,6-Dibromo-4,8-bis(4-chloro-5-(2-ethylhexyl)thiophen-2-yl)benzo[1,2-b:4,5-b']dithiophene (BDTTCl-Br) and (4,8-bis(4-chloro-5-(2-ethylhexyl)thiophen-2-yl)benzo[1,2-b:4,5-b']dithiophene-2,6-diyl)bis(trimethylstannane) (BDTTCl-Sn) were synthesized according to previous literature.<sup>1</sup> 2,6-Dibromo-4,8-bis(5-(2-ethylhexyl)thiophen-2-yl)benzo[1,2-b:4,5-b']dithiophene (BDTT-Br) was purchased from SunaTech. 2,6-Bis(trimethyltin)-4,8-bis(5-ethylhexyl-2-thienyl)benzo[1,2-b:4,5-b']-dithiophene (BDTT-Sn) and 1,3-dibromo-5-octyl-4H-thieno[3,4-c]pyrrole-4,6(5H)-dione (TPD-Br) were purchased from Solarmer, Inc. PC<sub>71</sub>BM was purchased from Brilliant Matter; all monomers were used without further purification.

*Synthesis of random copolymers:* B30T70 was synthesized following our previous study.<sup>2</sup> The monomers BDTT-Sn (200.0 mg, 0.2962 mmol), BDTT-Br (65.50 mg, 0.08886 mmol), and TPD-Br (87.70 mg, 0.2073 mmol) were polymerized to afford B30T70. Yield: 258.8 mg (93%). Number average molecular weights ( $M_n$ ) = 20 kg mol<sup>-1</sup> and dispersity ( $D$ ) = 3.7. Elem. Anal. Calcd: C, 69.42; H, 6.90; N, 1.05; O, 2.40; S, 20.03%. Found: C, 69.07; H, 7.01; N, 0.85; O, 2.85; S, 19.49%. A series of random copolymers B30T70-XCl, where X = 2, 4 or 6, was

synthesized using different combinations of Cl-free monomers, BDTTCl-Br, and BDTTCl-Sn while fixing TPD-Br (0.7 eq) as shown in **Scheme S1**.

Random copolymer B30T70-2Cl was synthesized using BDTTCl-Br (53.40 mg, 0.06633 mmol), BDTT-Sn (0.2000 mg, 0.2211 mmol), and TPD-Br (0.06550 mg, 0.1548 mmol). Yield: 201 mg (95%);  $M_n = 41 \text{ kg mol}^{-1}$  and  $D = 5.1$ . Elem. Anal. Calcd: C, 67.92; H, 6.69; N, 1.03; O, 2.34; S, 19.79; Cl, 2.23%. Found: C, 67.35; H, 6.77; N, 0.81; O, 2.73; S, 19.60; Cl, 2.74%

Random copolymer B30T70-4Cl was synthesized using BDTT-Br (45.4 mg, 0.06165 mmol), BDTTCl-Sn (200 mg, 0.2055 mmol), and TPD-Br (60.9 mg, 0.1438 mmol). Yield: 193 mg (93%);  $M_n = 24 \text{ kg mol}^{-1}$ , and  $D = 4.0$ . Elem. Anal. Calcd: C, 64.66; H, 6.23; N, 0.98; O, 2.23; S, 18.84; Cl, 7.06%. Found: C, 65.73; H, 6.9; N, 0.67; O, 2.45; S, 17.43; Cl, 6.82%

Random copolymer B30T70-6Cl was synthesized using BDTTCl-Br (49.6 mg, 0.06165 mmol), BDTT-Sn (200 mg, 0.2055 mmol) and TPD-Br (60.9 mg, 0.1438 mmol). Yield: 200 mg (95%);  $M_n = 25 \text{ kg mol}^{-1}$ , and  $D = 2.9$ . Elem. Anal. Calcd: C, 63.36; H, 6.04; N, 0.96; O, 2.19; S, 18.46; Cl, 9.00%. Found: C, 62.73; H, 6.13; N, 0.66; O, 2.58; S, 18.51; Cl, 9.39%

*Characterization:* The  $M_n$  and  $D$  of polymers were determined by size exclusion chromatography (SEC) using trichlorobenzene as the eluent at a temperature of 140 °C. To determine the composition of the polymers, EA was conducted using a Thermo Scientific Flash 2000 series instrument. The TGA was performed using a TA Instruments Q500(I) under a nitrogen atmosphere, employing a heating rate of 10 °C min<sup>-1</sup> from 30 °C to 500 °C to obtain the decomposition temperatures. DSC was measured using DSC200F3 under a nitrogen atmosphere, with a heating and cooling rate of 10 °C min<sup>-1</sup> from 30 °C to 300 °C. The UV-vis absorption spectra and CV were performed following our previous report.<sup>2</sup> For the UV-vis absorption spectra, the samples were analyzed using Shimadzu JP / UV-1900 spectrophotometer. Temperature-dependent absorption measurement in the chlorobenzene solvent state was performed in the range of RT-110 °C, and the concentration of the solutions

was  $2.7 \mu\text{g mL}^{-1}$ . CV was conducted using a WIZEIS-1200Premium electrochemical workstation with three electrode configurations. The PESA measurements were conducted using a Riken model AC-2 instrument with a power setting of 5 nW and a power count of 0.5. AFM images were acquired in tapping mode using a Park Systems model XE-100 instrument. The ESP analysis was carried out at B3LYP/6-31\* level using spartan'14. 2D-GIWAXS experiments were performed at the 9A U-SAXS beamline of the Pohang Accelerator Laboratory in Korea. The X-rays from the in-vacuum undulator were monochromated ( $\lambda = 1.12 \text{ \AA}$ ) with an incidence angle of  $0.12^\circ$ . 2D-GIWAXS patterns were collected by a two-dimensional CCD detector (MX170-HS, Rayonix Inc.). The detector was placed approximately 210 mm from the center of the sample. The incidence angle of the films was set at  $0.12^\circ$ . To obtain field-effect carrier mobility ( $\mu_{\text{sat}}$ ), field effect transistors were fabricated. Pristine and blend films were spin-coated on a 200 nm Si/SiO<sub>2</sub> substrate. A 50 nm thick Au source/drain electrode was deposited using a shadow mask (W: 600  $\mu\text{m}$  & L: 180  $\mu\text{m}$ ). The transfer curve was measured to understand the electrical characteristics of the random copolymers. The  $\mu_{\text{sat}}$  was calculated using the following equation.  $\mu_{\text{sat}} = 2 \frac{L}{WC} \left( \frac{\partial \sqrt{I_D}}{\partial V_G} \right)^2$  where,  $L$  ( $\mu\text{m}$ ) is the channel length,  $W$  ( $\mu\text{m}$ ) is the channel width,  $C$  ( $\text{F cm}^{-2}$ ) is the specific capacitance of the dielectric layer  $= 1.62 \times 10^{-8} \text{ F cm}^{-2}$ ,  $I_D$  ( $\mu\text{A}$ ) is the drain current,  $V_G$  (V) is the gate voltage. Finally, the mobility of the fabricated device was calculated by measuring the transfer curves through Keithley 4200. Nanosecond-Second Transient Absorption (ns-s TA) measurements were performed using the pump-probe technique. The TA setup employed for longer timescales uses an Nd:YAG laser (EL-YAG, 6–8 ns pulse width), which generates visible pulses (532 nm), and a third harmonic generator for EL-YAG, which generates UV pulses (355 nm). The probe beam originates from a 150 W Xenon lamp which reflected off the powder sample, and then a monochromator before it impinges onto a PMT-980 photodiode detector. Pump pulses are directed from the laser output to the sample via a liquid light guide and are overlapped with the probe beam at the

position of the sample. A comprehensive L900 spectrometer software package acquires data on two different time scales simultaneously: the ns- $\mu$ s signal is sampled using an oscilloscope (Tektronix MDO3022). Excitation fluences were measured using a pyroelectric energy sensor.

*Device fabrication:* All experimental procedures were adapted from existing literature.<sup>2</sup> Photoactive layer solutions were prepared by dissolving a total of 25 mg mL<sup>-1</sup> in chlorobenzene with 3 vol% 1,8-diiodooctane (DIO), with weight ratio of 1:2 (D:A), and stirred at 45 °C for 3 hour. The photoactive layer was deposited by spin coating at 1000 rpm for 60 s under nitrogen-controlled conditions. To characterize the light performance of organic IPV devices under indoor environment, two different types of artificial light sources were used: an LED lamp (McScience, Suwon, Republic of Korea) with light intensity ( $I_L$ : 0.254 mW cm<sup>-2</sup> at 1000 lx) and an FL (OSRAM DUL-UXSTAR STIC 11 W) with light intensity ( $I_L$ : 0.30 mW cm<sup>-2</sup> at 1000 lx). The active area of the OPV was estimated to be approximately 0.045 cm<sup>2</sup> using an optical microscope.

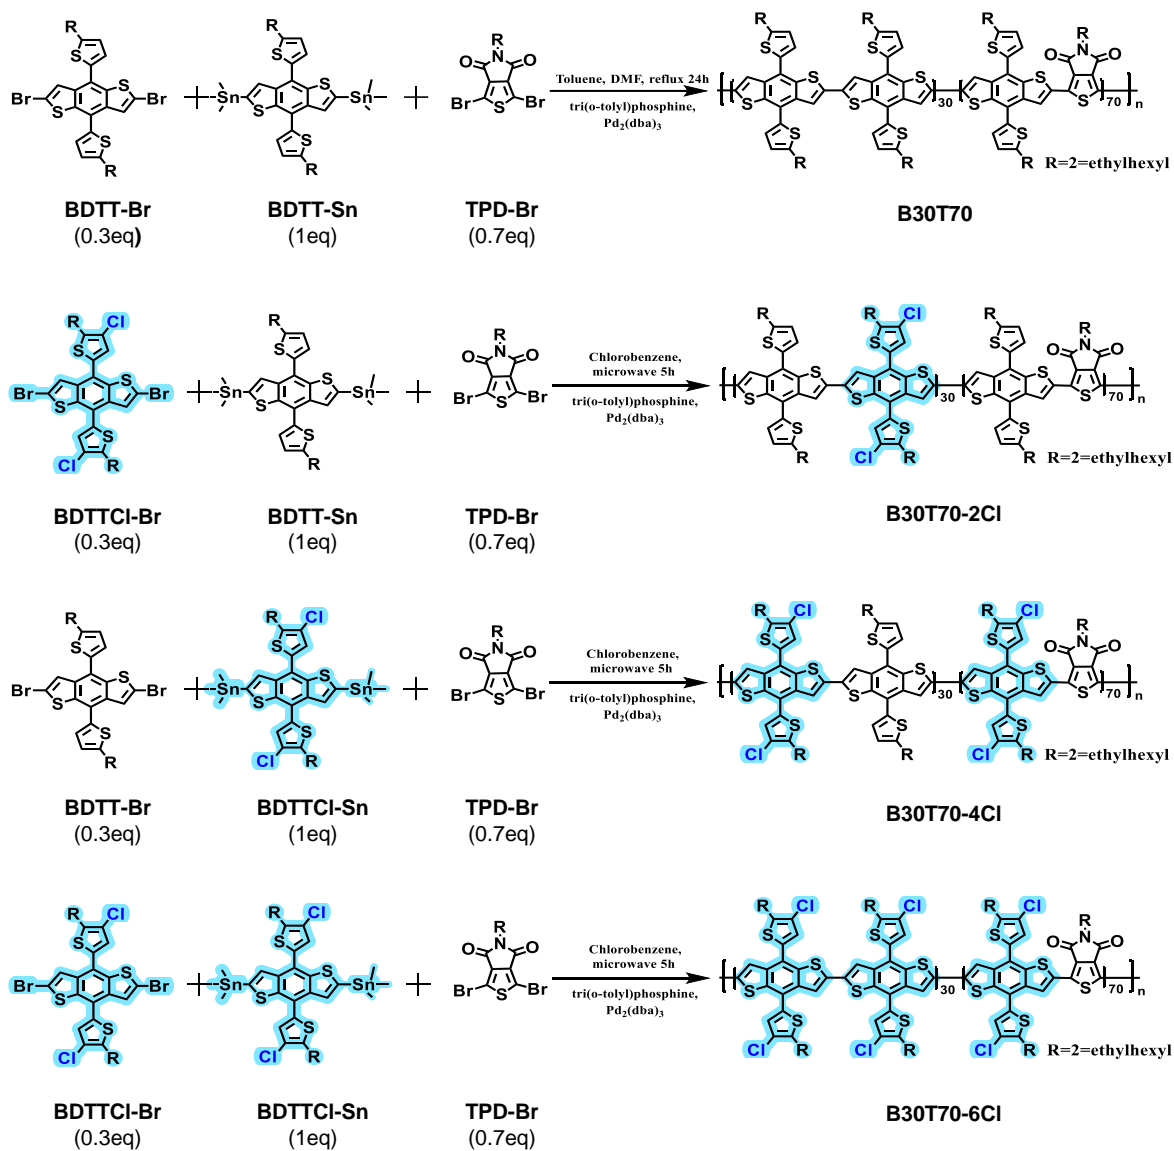

**Scheme. S1.** Synthetic scheme of B30T70-XCl (X=0, 2, 4, 6).

**Table S1.** Monomer feed ratio and Cl density of the B30T70-XCl random copolymers.

| Polymer           | Feed ratio   |              |                |                |             | Cl monomer density |
|-------------------|--------------|--------------|----------------|----------------|-------------|--------------------|
|                   | BDTT-Sn (eq) | BDTT-Br (eq) | BDTTCI-Sn (eq) | BDTTCI-Br (eq) | TPD-Br (eq) |                    |
| <b>B30T70</b>     | 1            | 0.3          | -              | -              | 0.7         | 0                  |
| <b>B30T70-2Cl</b> | 1            | -            | -              | 0.3            | 0.7         | 0.15               |
| <b>B30T70-4Cl</b> | -            | 0.3          | 1              | -              | 0.7         | 0.5                |
| <b>B30T70-6Cl</b> | -            | -            | 1              | 0.3            | 0.7         | 0.65               |

**Table S2.** Actual Cl ratio of B30T70-XCl determined by elemental analysis.

| Polymer           | C (%)               | H (%)              | N (%)              | O (%)              | S (%)               | Total (%)           | Cl (%)             |
|-------------------|---------------------|--------------------|--------------------|--------------------|---------------------|---------------------|--------------------|
| <b>B30T70</b>     | 69.42 <sup>a)</sup> | 6.90 <sup>a)</sup> | 1.05 <sup>a)</sup> | 2.40 <sup>a)</sup> | 20.03 <sup>a)</sup> | 99.8 <sup>a)</sup>  | 0                  |
|                   | 69.07 <sup>b)</sup> | 7.01 <sup>b)</sup> | 0.85 <sup>b)</sup> | 2.85 <sup>b)</sup> | 19.49 <sup>b)</sup> | 99.27 <sup>b)</sup> | 0                  |
| <b>B30T70-2Cl</b> | 67.92 <sup>a)</sup> | 6.69 <sup>a)</sup> | 1.03 <sup>a)</sup> | 2.34 <sup>a)</sup> | 19.79 <sup>a)</sup> | 97.77 <sup>a)</sup> | 2.23 <sup>a)</sup> |
|                   | 67.35 <sup>b)</sup> | 6.77 <sup>b)</sup> | 0.81 <sup>b)</sup> | 2.73 <sup>b)</sup> | 19.60 <sup>b)</sup> | 97.26 <sup>b)</sup> | 2.74 <sup>c)</sup> |
| <b>B30T70-4Cl</b> | 64.66 <sup>a)</sup> | 6.23 <sup>a)</sup> | 0.98 <sup>a)</sup> | 2.23 <sup>a)</sup> | 18.84 <sup>a)</sup> | 92.94 <sup>a)</sup> | 7.06 <sup>a)</sup> |
|                   | 65.73 <sup>b)</sup> | 6.9 <sup>b)</sup>  | 0.67 <sup>b)</sup> | 2.45 <sup>b)</sup> | 17.43 <sup>b)</sup> | 93.18 <sup>b)</sup> | 6.82 <sup>c)</sup> |
| <b>B30T70-6Cl</b> | 63.36 <sup>a)</sup> | 6.04 <sup>a)</sup> | 0.96 <sup>a)</sup> | 2.19 <sup>a)</sup> | 18.46 <sup>a)</sup> | 91.01 <sup>a)</sup> | 9.00 <sup>a)</sup> |
|                   | 62.73 <sup>b)</sup> | 6.13 <sup>b)</sup> | 0.66 <sup>b)</sup> | 2.58 <sup>b)</sup> | 18.51 <sup>b)</sup> | 90.61 <sup>b)</sup> | 9.39 <sup>c)</sup> |

<sup>a)</sup> Calculated values, <sup>b)</sup> measured values by elemental analysis, and <sup>c)</sup> 100-total.

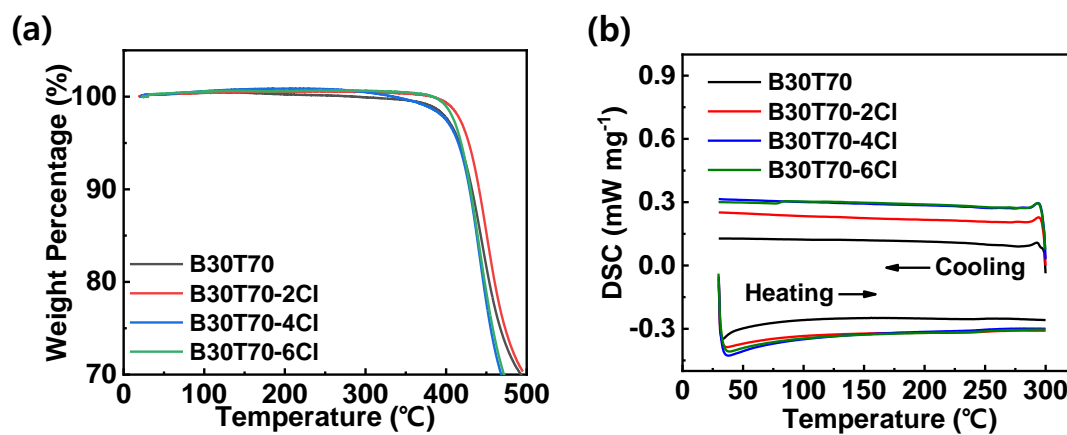

**Fig. S1.** (a) TGA and (b) DSC thermograms of random copolymers.



**Table S3.** Optical properties of random copolymers and PC<sub>71</sub>BM in thin films.

| Material            | $\lambda_{\max}$<br>(nm) | $\lambda_{\text{edge}}$<br>(nm) | $E_g^{\text{opt}}$<br>(eV) |
|---------------------|--------------------------|---------------------------------|----------------------------|
| B30T70              | 554, 601                 | 658                             | 1.88                       |
| B30T70-2Cl          | 555, 601                 | 658                             | 1.88                       |
| B30T70-4Cl          | 553, 598                 | 646                             | 1.92                       |
| B30T70-6Cl          | 554, 596                 | 649                             | 1.91                       |
| PC <sub>71</sub> BM | 481                      | 721                             | 1.72                       |

**Table S4.** Maximum efficiencies of photovoltaics under 1-Sun and indoor illumination.

| Condition                                   | Polymers          | $V_{oc}$<br>(mV) | $J_{sc}$                                                              |      | FF<br>(%) | PCE<br>(%) |
|---------------------------------------------|-------------------|------------------|-----------------------------------------------------------------------|------|-----------|------------|
|                                             |                   |                  | (Outdoor: mA cm <sup>-2</sup> ,<br>Indoor: $\mu$ A cm <sup>-2</sup> ) |      |           |            |
| AM 1.5G<br>(100 mW cm <sup>-2</sup> )       | <b>B30T70</b>     | 916              | 11.1                                                                  | 73.1 | 7.4       |            |
|                                             | <b>B30T70-2Cl</b> | 948              | 11.3                                                                  | 73.1 | 7.8       |            |
|                                             | <b>B30T70-4Cl</b> | 967              | 6.8                                                                   | 55.4 | 3.6       |            |
|                                             | <b>B30T70-6Cl</b> | 996              | 3.8                                                                   | 63.1 | 2.4       |            |
| FL 1000 lx<br>(0.30 mW cm <sup>-2</sup> )   | <b>B30T70</b>     | 774              | 119.5                                                                 | 74.5 | 22.9      |            |
|                                             | <b>B30T70-2Cl</b> | 806              | 122.5                                                                 | 76.0 | 25.0      |            |
|                                             | <b>B30T70-4Cl</b> | 821              | 74.3                                                                  | 61.3 | 12.5      |            |
|                                             | <b>B30T70-6Cl</b> | 819              | 42.1                                                                  | 65.2 | 7.5       |            |
| LED 1000 lx<br>(0.254 mW cm <sup>-2</sup> ) | <b>B30T70</b>     | 775              | 95.9                                                                  | 74.4 | 21.8      |            |
|                                             | <b>B30T70-2Cl</b> | 791              | 97.8                                                                  | 74.8 | 22.8      |            |
|                                             | <b>B30T70-4Cl</b> | 810              | 63.1                                                                  | 61.1 | 12.3      |            |
|                                             | <b>B30T70-6Cl</b> | 830              | 32.2                                                                  | 65.9 | 6.9       |            |

**Table S5.** Comparison of photovoltaic properties under standard AM 1.5G and FL illumination.

| Donor:acceptor                            | Device type           | Light source     | 1 Sun PCE (%) | Indoor PCE (%) | Increase in PCE (fold) | ref             |
|-------------------------------------------|-----------------------|------------------|---------------|----------------|------------------------|-----------------|
| <b>B30T70-2Cl:PC<sub>71</sub>BM</b>       |                       | <b>FL 1000lx</b> | <b>7.8</b>    | <b>25.0</b>    | <b>3.2</b>             | <b>Our work</b> |
| <b>B30T70:PC<sub>71</sub>BM</b>           |                       | <b>FL 1000lx</b> | <b>7.4</b>    | <b>22.9</b>    | <b>3.1</b>             |                 |
| P3HT:PC <sub>71</sub> BM                  |                       | FL 300lx         | 2.4           | 5.8            | 2.4                    |                 |
| PCDTBT:PC <sub>71</sub> BM                |                       | FL 300lx         | 6.0           | 16.6           | 2.8                    | 3               |
| PTB7:PC <sub>71</sub> BM                  |                       | FL 300lx         | 6.8           | 14.6           | 2.1                    |                 |
| P3HT:ICBA                                 | Fullerene based       | FL 500lx         | 4.97          | 14.36          | 2.9                    |                 |
| P3HT:PC <sub>60</sub> BM                  |                       | FL 500lx         | 3.75          | 9.74           | 2.6                    | 4               |
| PBDTTT-EFT:PC <sub>70</sub> BM            |                       | FL 500lx         | 7.22          | 13.4           | 1.9                    |                 |
| PDTBTBz-2Fanti:PC <sub>71</sub> BM        |                       | FL 1000lx        | 7.0           | 18.6           | 2.7                    |                 |
| PBDB-T:PC <sub>71</sub> BM                |                       | FL 1000lx        | 6.2           | 12.5           | 2.0                    | 5               |
| P3HT:PC <sub>71</sub> BM                  |                       | FL 1000lx        | 2.7           | 7.7            | 2.9                    |                 |
| PTB7:PC <sub>71</sub> BM                  |                       | FL 1000lx        | 6.2           | 10.5           | 1.7                    |                 |
| PBDB-TSCI:IT-4F                           |                       | FL 1000lx        | 13.4          | 20.1           | 1.5                    | 6               |
| CD1:ITIC                                  | Non-fullerene based   | FL 1000lx        | 8.5           | 17.9           | 2.1                    | 7               |
| CD1:PBN-10                                |                       | FL 1000lx        | 7.9           | 26.2           | 3.3                    |                 |
| CD1:PBN-14                                |                       | FL 1000lx        | 7.9           | 22.9           | 2.9                    | 8               |
| PCDTBT:PDTSTPD:PC <sub>71</sub> BM        | Multi-component based | FL 300lx         | 6.0           | 20.8           | 3.5                    | 9               |
| PBDB-T:PTB7Th:ITIC-Th:PC <sub>70</sub> BM |                       | FL 1000lx        | 7.9           | 14.7           | 1.9                    | 10              |

**Table S6.** SC values of fullerene and non-fullerene acceptors.

| Type                       | Acceptor            | SC <sub>A</sub> | ref |
|----------------------------|---------------------|-----------------|-----|
| <b>Fullerene acceptors</b> | PC <sub>61</sub> BM | 17.4            | 11  |
|                            | PC <sub>71</sub> BM | 17.4            |     |
| <b>Fused acceptors</b>     | IT-4F               | 64.1            | 12  |
|                            | ITIC-4Cl            | 51.9            | 11  |
|                            | ITIC                | 54.5            |     |
|                            | COi8DFIC            | 86.1            |     |
|                            | Y6                  | 71.0            |     |
|                            | BTP-eC9 (Y7)        | 80.0            |     |
|                            | L8-BO               | 71.1            |     |
|                            | CH1007              | 69.8            |     |
|                            | M34                 | 67.5            | 12  |
|                            | 4TIC-4F             | 59.8            |     |
|                            | IFIC-i-4F           | 91.2            |     |
|                            | IEICO-4F            | 72.6            |     |
|                            | F8IC                | 80.7            |     |
|                            | FOIC                | 74.1            |     |
|                            | O-IDTBR             | 56.0            | 11  |
| <b>Non-fused acceptors</b> | CO1-4F              | 64.8            |     |
|                            | W1                  | 50.0            |     |
|                            | Ph04T-3             | 49.1            |     |
|                            | 4T-3                | 28.4            |     |
|                            | NoCA-5              | 76.1            |     |
|                            | TPDC-4F             | 64.8            |     |
|                            | BN-2F               | 53.2            | 12  |
|                            | DBT-HD              | 35.4            |     |
|                            | C60T-4F             | 58.8            |     |
|                            | A4T-16              | 33.3            |     |
|                            | 2BTh-2F             | 38.4            |     |
|                            | o-4TBC-2F           | 45.9            |     |
| PTB4Cl                     | 33.5                |                 |     |

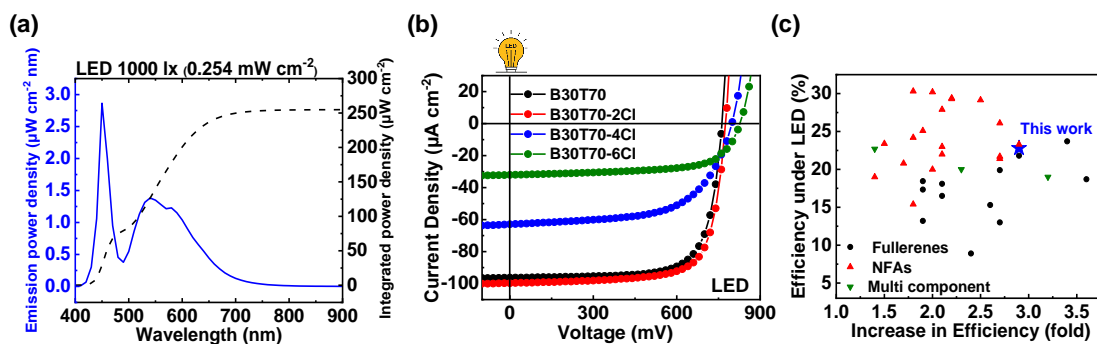

**Fig. S2.** (a) Emission power and integrated emission power spectra of LED (b)  $J$ - $V$  curve under illumination of LED 1000 lx. (c) Comparison of PCE and increase in the PCE of IOPVs under LED illumination.

**Table S7.** Photovoltaic parameters under illumination of LED 1000 lx.

| Polymer           | Condition                             | $V_{oc}$<br>(mV) | $J_{sc}$<br>( $\mu A\ cm^{-2}$ ) | FF<br>(%)      | $PCE_{avg}^{a)}$<br>( $P_{max}$ )<br>(%) |
|-------------------|---------------------------------------|------------------|----------------------------------|----------------|------------------------------------------|
| <b>B30T70</b>     |                                       | $774 \pm 10$     | $95.7 \pm 1.7$                   | $73.6 \pm 0.7$ | $21.1 \pm 0.5$<br>(21.8)                 |
| <b>B30T70-2CI</b> | LED<br>1000 lx                        | $783 \pm 8$      | $97.7 \pm 0.6$                   | $74.1 \pm 0.9$ | $22.0 \pm 0.9$<br>(22.8)                 |
| <b>B30T70-4CI</b> | (Irradiance<br>$0.254\ mW\ cm^{-2}$ ) | $802 \pm 7$      | $63.4 \pm 0.8$                   | $60.3 \pm 1.1$ | $12.0 \pm 0.2$<br>(12.3)                 |
| <b>B30T70-6CI</b> |                                       | $819 \pm 9$      | $31.2 \pm 1.0$                   | $65.4 \pm 1.0$ | $6.7 \pm 0.3$<br>(6.9)                   |

<sup>a)</sup> Average PCE values obtained from 5 different devices

**Table S8.** Comparison of photovoltaic properties under standard AM 1.5G illumination and LED.

| Donor:acceptor                      | Device type         | Light source       | 1 Sun PCE (%) | Indoor PCE (%) | Increase in PCE (fold) | ref             |
|-------------------------------------|---------------------|--------------------|---------------|----------------|------------------------|-----------------|
| <b>B30T70-2Cl:PC<sub>71</sub>BM</b> |                     | <b>LED 1000 lx</b> | <b>7.8</b>    | <b>22.8</b>    | <b>2.9</b>             |                 |
| <b>B30T70:PC<sub>71</sub>BM</b>     |                     | <b>LED 1000 lx</b> | <b>7.4</b>    | <b>21.8</b>    | <b>2.9</b>             | <b>Our work</b> |
| PCDTBT:PC <sub>71</sub> BM          |                     | LED 300 lx         | 5.3           | 18.7           | 3.5                    | 13              |
| P3HT:ICBA                           |                     | LED 500 lx         | 4.97          | 13.47          | 2.7                    |                 |
| P3HT:PC <sub>60</sub> BM            |                     | LED 500 lx         | 3.75          | 9.04           | 2.4                    | 4               |
| PBDTTT-EFT:PC <sub>70</sub> BM      |                     | LED 500 lx         | 7.22          | 13.37          | 1.9                    |                 |
| WF3F:PC <sub>71</sub> BM            |                     | LED 500 lx         | 9.44          | 17.34          | 1.8                    | 14              |
| PTQ10:PC <sub>61</sub> BM           | Fullerene based     | LED 500 lx         | 7.5           | 19.9           | 2.7                    | 15              |
| PTB7-Th:PC <sub>71</sub> BM         |                     | LED 1000 lx        | 9.67          | 18.55          | 1.9                    | 16              |
| PBDB-TF:PC <sub>71</sub> BM         |                     | LED 1000 lx        | 8.43          | 18.1           | 2.1                    | 17              |
| PBDB-T:PC <sub>71</sub> BM          |                     | LED 1000 lx        | 6.2           | 15.7           | 2.5                    | 5               |
| PDTBTBz-2Fanti:PC <sub>71</sub> BM  |                     | LED 1000 lx        | 7.0           | 23.7           | 3.4                    |                 |
| PPDT2FBT:PC <sub>71</sub> BM        |                     | LED 1000 lx        | 7.7           | 16.5           | 2.1                    | 18              |
| PTB7-Th:PC <sub>70</sub> BM         |                     | LED 890 lx         | 8.43          | 11.63          | 1.4                    | 19              |
| PBDB-TF:ITCC                        |                     | LED 1000 lx        | 10.3          | 22             | 2.1                    | 17              |
| PBDB-TF:IT-4F                       |                     | LED 1000 lx        | 12.2          | 20.8           | 1.7                    |                 |
| PBDB-TF:IO-4Cl                      |                     | LED 1000 lx        | 9.7           | 26.1           | 2.7                    | 20              |
| PM6:Y6-O                            |                     | LED 1200 lx        | 16.5          | 30.31          | 1.8                    | 21              |
| PB2:FTCC-Br                         |                     | LED 1000 lx        | 14.8          | 30.2           | 2                      | 22              |
| S2:LBT-DCI                          |                     | LED 1000 lx        | 13.2          | 25.1           | 1.9                    |                 |
| S2:LBT-DF                           |                     | LED 1000 lx        | 13.4          | 24.2           | 1.8                    | 23              |
| PM6:FCC-Cl                          | Non-fullerene based | LED 1000 lx        | 13.0          | 27.9           | 2.1                    |                 |
| D18:FCC-Cl                          |                     | LED 1000 lx        | 13.1          | 29.4           | 2.2                    | 24              |
| D18:FCC-Cl-4Ph                      |                     | LED 1000 lx        | 13.12         | 29.3           | 2.2                    | 25              |
| CD1:ITIC                            |                     | LED 1000 lx        | 8.7           | 15.4           | 1.8                    |                 |
| CD1:PBN-10                          |                     | LED 1000 lx        | 8.0           | 21.7           | 2.7                    | 7               |
| CD1:PBN-14                          |                     | LED 1000 lx        | 7.9           | 21.4           | 2.7                    | 8               |
| PBDB-T:BTA3                         |                     | LED 1000 lx        | 8.0           | 23.3           | 2.9                    | 26              |
| PTQ10:IDIC                          |                     | LED 1200 lx        | 9.9           | 20             | 2.0                    |                 |
| PTQ10:IDIC-Br                       |                     | LED 1200 lx        | 10.8          | 23             | 2.1                    | 27              |

|                                    |                       |             |      |       |     |    |
|------------------------------------|-----------------------|-------------|------|-------|-----|----|
| PBDB-TF:HDO-4Cl                    |                       | LED 1000 lx | 15.6 | 23.4  | 1.5 | 28 |
| PBDB-TF:GS-ISO                     |                       | LED 1000 lx | 11.6 | 29.15 | 2.5 | 29 |
| PM6:M36                            |                       | LED 1000 lx | 13.8 | 19    | 1.4 | 30 |
| PM6:Y6:Y-Th2                       |                       | LED 1000 lx | 16.0 | 22.7  | 1.4 | 31 |
| PCDTBT:PDTSTPD:PC <sub>71</sub> BM | Multi-component based | LED 300 lx  | 6    | 19    | 3.2 | 9  |
| J52-F:PM7:BTA3                     |                       | LED 300 lx  | 8.8  | 20    | 2.3 | 32 |



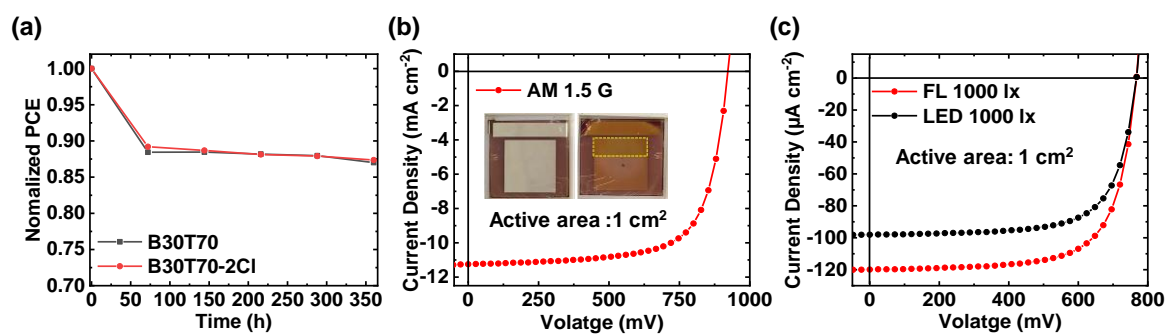

**Fig. S3.** (a) Stability test under continuous LED illumination (2000 lx). *J-V* curves for large-area devices based on B30T70-2Cl under (b) 1-Sun and (c) indoor lighting conditions.

**Table S9.** Large-area efficiency of B30T70-XCl:PC<sub>71</sub>BM based device under 1-Sun, FL, and LED illumination.

| Condition                                  | Polymer           | V <sub>oc</sub><br>(mV) | J <sub>sc</sub><br>(Outdoor: mA cm <sup>-2</sup> ,<br>Indoor: μA cm <sup>-2</sup> ) | FF<br>(%)  | PCE <sup>a)</sup><br>(%) |
|--------------------------------------------|-------------------|-------------------------|-------------------------------------------------------------------------------------|------------|--------------------------|
| AM 1.5G<br>(100 mW cm <sup>-2</sup> )      | <b>B30T70</b>     | 898 ± 4                 | 11.1 ± 0.1                                                                          | 69.5 ± 1.2 | 6.9 ± 0.1                |
|                                            | <b>B30T70-2Cl</b> | 922 ± 10                | 11.2 ± 0.2                                                                          | 70.2 ± 0.9 | 7.2 ± 0.2                |
|                                            | <b>B30T70-4Cl</b> | 953 ± 8                 | 6.4 ± 0.1                                                                           | 47.2 ± 1.5 | 2.9 ± 0.2                |
|                                            | <b>B30T70-6Cl</b> | 978 ± 7                 | 3.5 ± 0.3                                                                           | 58.4 ± 0.7 | 2.0 ± 0.1                |
| FL 1000lx<br>(0.30 mW cm <sup>-2</sup> )   | <b>B30T70</b>     | 741 ± 5                 | 118.4 ± 2.1                                                                         | 70.1 ± 1.9 | 20.4 ± 0.5               |
|                                            | <b>B30T70-2Cl</b> | 767 ± 7                 | 120.0 ± 1.4                                                                         | 70.5 ± 2.3 | 21.5 ± 0.4               |
|                                            | <b>B30T70-4Cl</b> | 793 ± 13                | 75.3 ± 1.7                                                                          | 57.9 ± 1.8 | 11.5 ± 0.5               |
|                                            | <b>B30T70-6Cl</b> | 801 ± 8                 | 42.7 ± 0.8                                                                          | 61.6 ± 1.2 | 7.0 ± 0.3                |
| LED 1000lx<br>(0.254 mW cm <sup>-2</sup> ) | <b>B30T70</b>     | 736 ± 9                 | 96.2 ± 1.5                                                                          | 70.3 ± 1.5 | 19.6 ± 0.4               |
|                                            | <b>B30T70-2Cl</b> | 770 ± 6                 | 98.2 ± 1.1                                                                          | 71.0 ± 2.1 | 21.1 ± 0.5               |
|                                            | <b>B30T70-4Cl</b> | 789 ± 11                | 61.2 ± 1.6                                                                          | 58.2 ± 1.6 | 11.0 ± 0.3               |
|                                            | <b>B30T70-6Cl</b> | 803 ± 7                 | 32.4 ± 1.3                                                                          | 61.7 ± 0.8 | 6.3 ± 0.2                |

<sup>a)</sup> Average PCE values obtained from 5 different devices

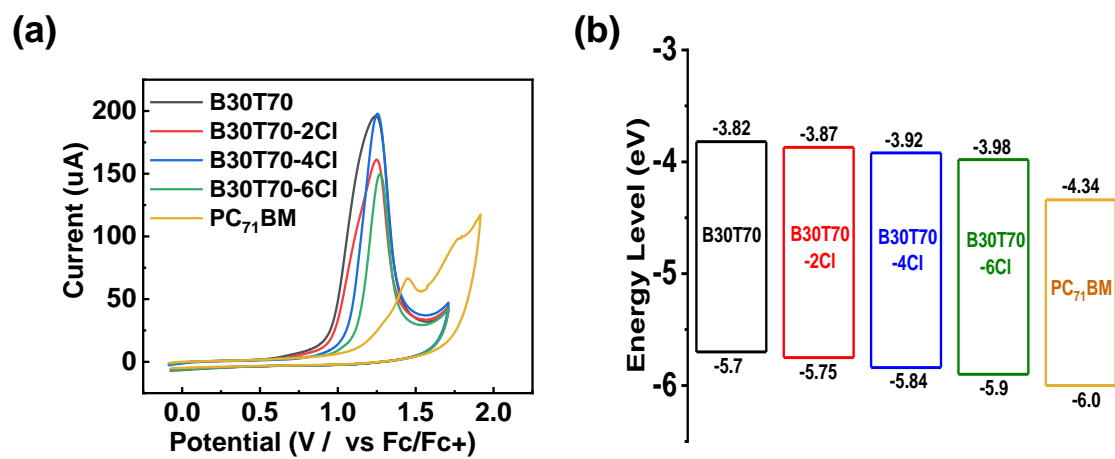

**Fig. S4.** (a) CV of the random copolymers and PC<sub>71</sub>BM, along with (b) the corresponding energy level diagram.

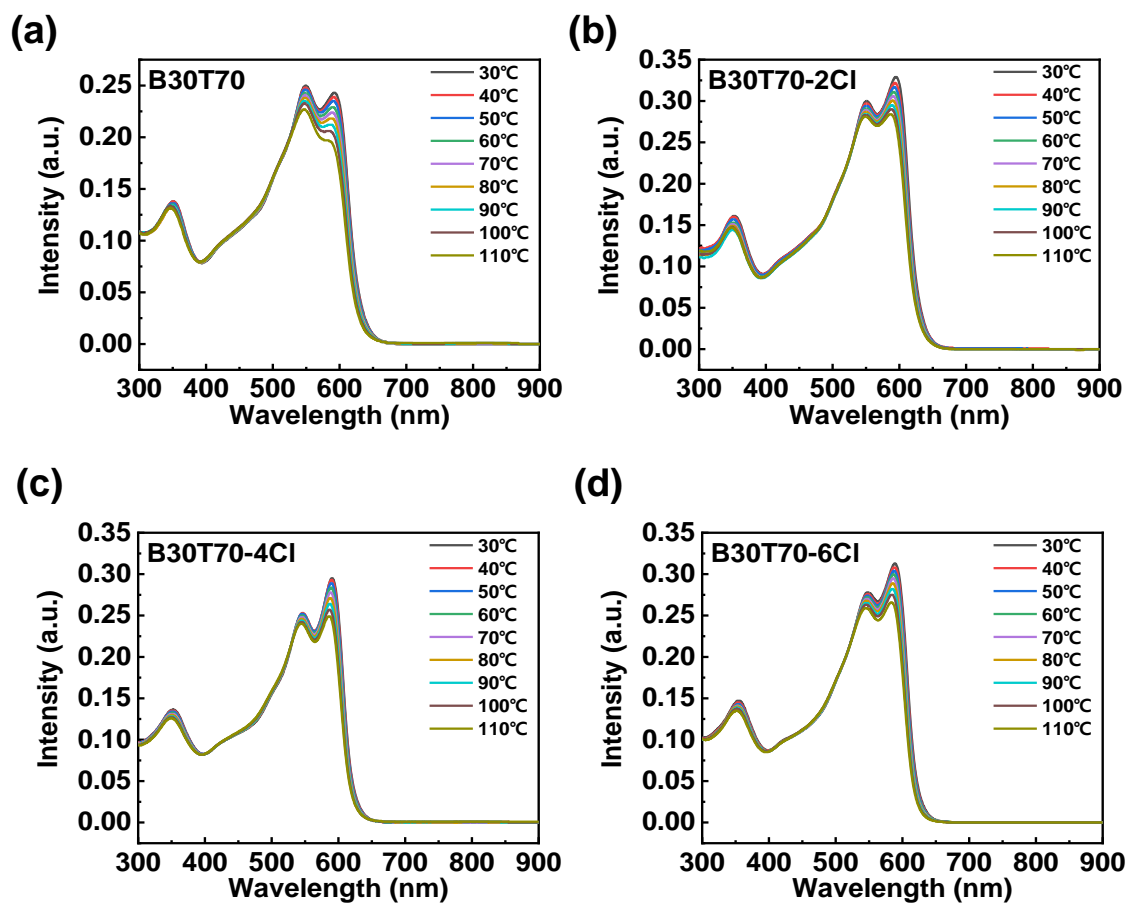

Fig. S5. Temperature-dependent UV-vis absorption spectra of random copolymers.

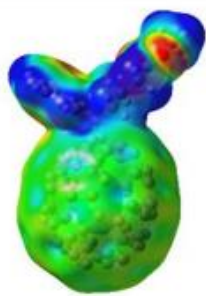

**Fig. S6.** ESP of PC<sub>71</sub>BM<sup>33</sup>

**Table S10.** Exciton dissociation probability of B30T70-XCl:PC<sub>71</sub>BM based devices.

| Material          | AM 1.5G  |           |                                    | Indoor   |           |                                    |
|-------------------|----------|-----------|------------------------------------|----------|-----------|------------------------------------|
|                   | $J_{sc}$ | $J_{sat}$ | $P_{diss}$<br>( $J_{sc}/J_{sat}$ ) | $J_{sc}$ | $J_{sat}$ | $P_{diss}$<br>( $J_{sc}/J_{sat}$ ) |
| <b>B30T70</b>     | 10.9     | 11.07     | 0.98                               | 117.2    | 119.73    | 0.98                               |
| <b>B30T70-2Cl</b> | 11.0     | 11.70     | 0.94                               | 120.7    | 121.67    | 0.99                               |
| <b>B30T70-4Cl</b> | 6.7      | N.A       | N.A                                | 75.1     | N.A       | N.A                                |
| <b>B30T70-6Cl</b> | 3.6      | N.A       | N.A                                | 41.2     | N.A       | N.A                                |

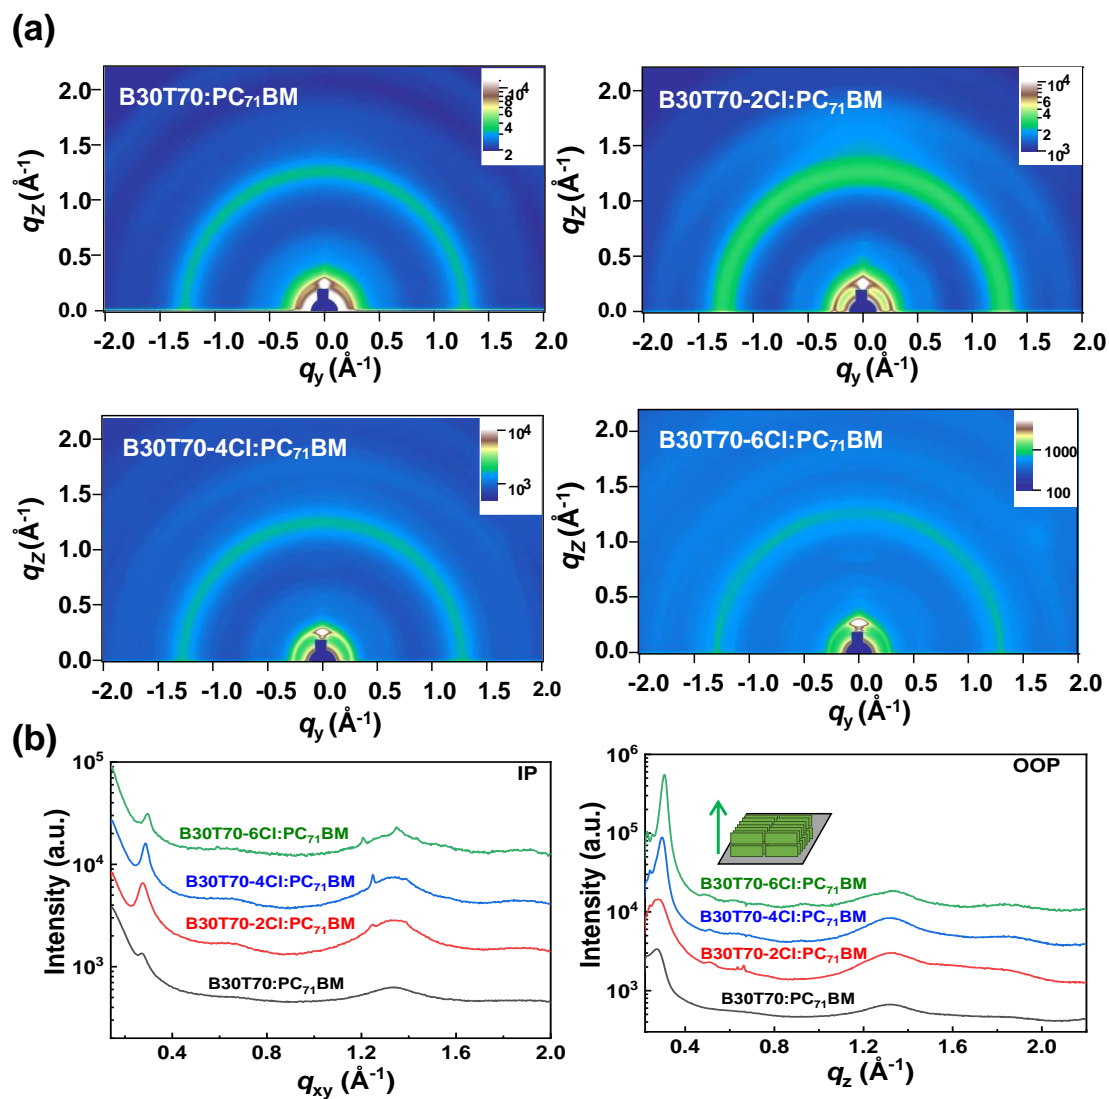

**Fig. S7.** (a) 2D-GIWAXS patterns and (b) diffraction profiles of in-plane and out-of plane line-cut profiles of blend films.

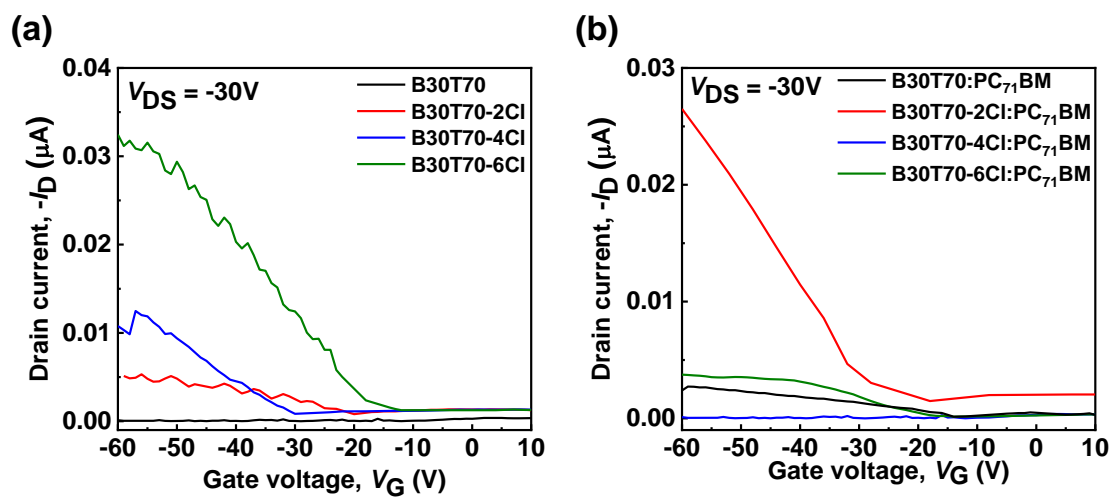

**Fig. S8.** Transfer curves of OFETs for (a) B30T0-XCl and (b) B30T0-XCl:PC<sub>71</sub>BM blends.



**Table S11.** Charge mobility values obtained from OFETs.

|                 | <b>B30T70</b><br>( $\text{cm}^2 \text{V}^{-1} \text{s}^{-1}$ ) | <b>B30T70-2Cl</b><br>( $\text{cm}^2 \text{V}^{-1} \text{s}^{-1}$ ) | <b>B30T70-4Cl</b><br>( $\text{cm}^2 \text{V}^{-1} \text{s}^{-1}$ ) | <b>B30T70-6Cl</b><br>( $\text{cm}^2 \text{V}^{-1} \text{s}^{-1}$ ) |
|-----------------|----------------------------------------------------------------|--------------------------------------------------------------------|--------------------------------------------------------------------|--------------------------------------------------------------------|
| <b>Pristine</b> | N/A                                                            | $1.67 \times 10^{-5}$                                              | $2.64 \times 10^{-4}$                                              | $5.04 \times 10^{-4}$                                              |
| <b>Blend</b>    | $5.26 \times 10^{-5}$                                          | $6.73 \times 10^{-4}$                                              | N/A                                                                | $1.17 \times 10^{-4}$                                              |

## References

- 1 S. Zhang, Y. Qin, J. Zhu and J. Hou, *Adv. Mater.*, 2018, **30**, 1800868.
- 2 J. Kim, M. A. Saeed, S. H. Kim, D. Lee, Y. Jang, J. S. Park, D. Lee, C. Lee, B. J. Kim, H. Y. Woo, J. W. Shim and W. Lee, *Macromol. Rapid Commun.*, 2022, **43**, 2200279.
- 3 H. K. H. Lee, Z. Li, J. R. Durrant and W. C. Tsoi, *Appl. Phy. Lett.*, 2016, **108**, 253301.
- 4 S. Yang, Z. Hsieh, M. L. Keshtov, G. D. Sharma and F. Chen, *Sol. RRL*, 2017, **1**, 1700174.
- 5 Y. You, C. E. Song, Q. V. Hoang, Y. Kang, J. S. Goo, D. Ko, J. Lee, W. S. Shin and J. W. Shim, *Adv. Funct. Mater.*, 2019, **29**, 1901171.
- 6 S. Park, H. Ahn, J. Kim, J. B. Park, J. Kim, S. H. Im and H. J. Son, *ACS Energy Lett.*, 2019, **5**, 170-179.
- 7 Z. Ding, R. Zhao, Y. Yu and J. Liu, *J. Mater. Chem. A*, 2019, **7**, 26533-26539.
- 8 J. Wang, Y. Gao, Y. Yu, R. Zhao, L. Zhang and J. Liu, *Org. Electron.*, 2021, **92**, 106134.
- 9 H. Yin, J. K. W. Ho, S. H. Cheung, R. J. Yan, K. L. Chiu, X. Hao and S. K. So, *J. Mater. Chem. A*, 2018, **6**, 8579-8585.
- 10 M. Nam, H. Y. Noh, J. Kang, J. Cho, B. K. Min, J. W. Shim and D. Ko, *Nano Energy*, 2019, **58**, 652-659.
- 11 R. Po, G. Bianchi, C. Carbonera and A. Pellegrino, *Macromolecules*, 2015, **48**, 453-461.
- 12 D. Luo, C. J. Brabec and A. K. K. Kyaw, *Nano Energy*, 2023, **114**, 108661.

- 13 H. Yin, S. Chen, S. H. Cheung, H. W. Li, Y. Xie, S. W. Tsang, X. Zhu and S. K. So, *J. Chem. C*, 2018, **6**, 9111-9118.
- 14 R. Singh, C. L. Chochos, V. G. Gregoriou, A. D. Nega, M. Kim, M. Kumar, S. Shin, S. H. Kim, J. W. Shim and J. Lee, *ACS Appl. Mater. Interfaces*, 2019, **11**, 36905.
- 15 X. Rodríguez-Martínez, S. Riera-Galindo, J. Cong, T. Österberg, M. Campoy-Quiles and O. Inganäs, *J. Mater. Chem. A*, 2022, **1**, 1768-1779.
- 16 M. Nam, S. Baek and D. Ko, *Appl. Surf. Sci.*, 2020, **526**, 146632.
- 17 Y. Cui, H. Yao, T. Zhang, L. Hong, B. Gao, K. Xian, J. Qin and J. Hou, *Adv. Mater.*, 2019, **31**, 1904512.
- 18 S. Shin, C. W. Koh, P. Vincent, J. S. Goo, J. Bae, J. Lee, C. Shin, H. Kim, H. Y. Woo and J. W. Shim, *Nano Energy*, 2019, **58**, 466-475.
- 19 S. Mori, T. Gotanda, Y. Nakano, M. Saito, K. Todorí and M. Hosoya, *Jpn. J. Appl. Phys.*, 2015, **54**, 71602.
- 20 Y. Cui, Y. Wang, J. Bergqvist, H. Yao, Y. Xu, B. Gao, C. Yang, S. Zhang, O. Inganäs, F. Gao and J. Hou, *Nat. Energy*, 2019, **4**, 768-775.
- 21 L. Ma, Y. Chen, P. C. Y. Chow, G. Zhang, J. Huang, C. Ma, J. Zhang, H. Yin, A. M. Hong Cheung, K. S. Wong, S. K. So and H. Yan, *Joule*, 2020, **4**, 1486-1500.
- 22 T. Zhang, C. An, Y. Xu, P. Bi, Z. Chen, J. Wang, N. Yang, Y. Yang, B. Xu, H. Yao, X. Hao, S. Zhang and J. Hou, *Adv. Mater.*, 2022, **34**, 2207009.
- 23 X. Li, S. Luo, H. Sun, H. H. Sung, H. Yu, T. Liu, Y. Xiao, F. Bai, M. Pan, X. Lu, I. D. Williams, X. Guo, Y. Li and H. Yan, *Energy Environ. Sci.*, 2021, **14**, 4555-4563.

- 24 F. Bai, J. Zhang, A. Zeng, H. Zhao, K. Duan, H. Yu, K. Cheng, G. Chai, Y. Chen, J. Liang, W. Ma and H. Yan, *Joule*, 2021, **5**, 1231-1245.
- 25 S. Luo, F. Bai, J. Zhang, H. Zhao, I. Angunawela, X. Zou, X. Li, Z. Luo, K. Feng, H. Yu, K. S. Wong, H. Ade, W. Ma and H. Yan, *Nano Energy*, 2022, **98**, 107281.
- 26 Z. Chen, T. Wang, Z. Wen, P. Lu, W. Qin, H. Yin and X. Hao, *ACS Energy Lett.*, 2021, **6**, 3203.
- 27 C. L. Radford, P. D. Mudiyansele, A. L. Stevens and T. L. Kelly, *ACS Energy Lett.*, 2022, **7**, 1635-1641.
- 28 Y. Xu, H. Yao, L. Ma, Z. Wu, Y. Cui, L. Hong, Y. Zu, J. Wang, H. Y. Woo and J. Hou, *Mater. Chem. Front.*, 2021, **5**, 893-9.
- 29 P. Bi, S. Zhang, J. Ren, Z. Chen, Z. Zheng, Y. Cui, J. Wang, S. Wang, T. Zhang, J. Li, Y. Xu, J. Qin, C. An, W. Ma, X. Hao and J. Hou, *Adv. Mater.*, 2021, **34**, 2108090.
- 30 X. Zhou, H. Wu, B. Lin, H. B. Naveed, J. Xin, Z. Bi, K. Zhou, Y. Ma, Z. Tang, C. Zhao, Q. Zheng, Z. Ma and W. Ma, *ACS Appl. Mater. Interfaces*, 2021, **13**, 44604.
- 31 Y. Cho, T. Kumari, S. Jeong, S. M. Lee, M. Jeong, B. Lee, J. Oh, Y. Zhang, B. Huang, L. Chen and C. Yang, *Nano Energy*, 2020, **75**, 104896.
- 32 Y. Bai, R. Yu, Y. Bai, E. Zhou, T. Hayat, A. Alsaedi and Z. Tan, *GEE*, 2021, **6**, 920-928.
- 33 H. Yao, Y. Cui, D. Qian, C. S. Ponceca, A. Honarfar, Y. Xu, J. Xin, Z. Chen, L. Hong, B. Gao, R. Yu, Y. Zu, W. Ma, P. Chabera, T. Pullerits, A. Yartsev, F. Gao and J. Hou, *J. Am. Chem. Soc.*, 2019, **141**, 7743.
